# Supplementary material
Source: PubMed Central journal article supplement (PMC3837936)
Supplement: EC.00140-13_zek999094177so1.pdf [file EC.00140-13_zek999094177so1.pdf]

## Supplemental Tables and Figures

**Table S1: *Schizosaccharomyces pombe* strains used in this study**

| Strain | Genotype                                                            | Figure                    | Source                             |
|--------|---------------------------------------------------------------------|---------------------------|------------------------------------|
| OHI246 | <i>h- leu1-32 ura4-D18 ade6-M210</i>                                | 2, 3, 4, 5, 6, 7          | K. Gould <sup>a</sup>              |
| OHI408 | <i>h- cwf10 2-127Δ ade6-M21X leu1-32 ura4-D18</i>                   | 2, 3, 4, 5, 6, 7, Table 2 | This work                          |
| OHI479 | <i>h+ brr2-HA::kanR ade6-M210 leu1-32 ura4-D18</i>                  | 2                         | Adapted from K. Gould <sup>a</sup> |
| OHI480 | <i>h+ prp3-linker3XV5 cwf10 2-127Δ ade6-M21X leu1-32 ura4-D18</i>   | 2                         | This work                          |
| OHI371 | <i>h+ prp3-linker3XV5</i>                                           | 2                         | This work                          |
| OHI482 | <i>h- brr2-HA::kanR cwf10 2-127Δ ade6-M21X leu1-32 ura4-D18</i>     | 2, S3                     | This work                          |
| OHI323 | <i>h- prp1-myc13X::kanR ade6-M210 leu1-32 ura4-D18</i>              | 2, 4                      | (1)                                |
| OHI439 | <i>h- prp1-myc13X::kanR cwf10 2-127Δ ade6-M21X leu1-32 ura4-D18</i> | 2, 4                      | This work                          |
| OHI448 | <i>h- cwf10 2-127Δ::kanR ade6-M21X leu1-32 ura4-D18</i>             | 5                         | This work                          |
| OHI463 | <i>h+ cdc28-P8</i>                                                  | 5                         | Adapted from (2)                   |
| OHI467 | <i>h+ cdc28-P8 cwf10 2-127Δ::kanR ade6-M21X ura4-D18</i>            | 5                         | This work                          |
| OHI464 | <i>h+ prp10-1</i>                                                   | 5                         | Adapted from (3)                   |
| OHI468 | <i>h+ prp10-1 cwf10 2-127Δ::kanR</i>                                | 5                         | This work                          |
| OHI466 | <i>h+ spp42-1::kanR leu1-32</i>                                     | 5                         | Adapted from (4)                   |
| OHI465 | <i>h+ spp41-1::kanR leu1-32 ura4-D18</i>                            | 5                         | Adapted from (4)                   |
| OHI471 | <i>h+ spp41-1::kanR cwf10 2-127Δ ade6-M21X leu1-32 ura4-D18</i>     | 5                         | This work                          |
| OHI322 | <i>h+ prp1-4 ura4-D18</i>                                           | 5                         | Adapted from (3)                   |
| OHI321 | <i>h+ prp4-73 leu1-32 ura4-294</i>                                  | 5                         | Adapted from (5)                   |
| OHI462 | <i>h- prp4-73 cwf10 2-127Δ::kanR leu1-32 ura4-D18 or -294</i>       | 5                         | This work                          |
| OHI478 | <i>h+ aar2::kanR ade6-M216 leu1-32 ura4-D18</i>                     | 5                         | (6)                                |
| OHI481 | <i>h- aar2::kanR cwf10 2-127Δ ade6-M21X leu1-</i>                   | 5                         | This work                          |

|        |                                                                                        |                        |                  |
|--------|----------------------------------------------------------------------------------------|------------------------|------------------|
|        | <i>32 ura4-D18</i>                                                                     |                        |                  |
| OHI483 | <i>h+ cwf10 2-23Δ ade6-M21X leu1-32 ura4-D18</i>                                       | 6                      | This work        |
| OHI260 | <i>h- cdc5-TAP::kanR</i>                                                               | Tables 1, 2            | Adapted from (7) |
| OHI491 | <i>h- cdc5-TAP::kanR cwf10 2-127Δ leu1-32</i>                                          | Table 1                | This work        |
| OHI383 | <i>h-/h+ cwf10+/cwf10::ura4+ ade6-M210/ade6-M216 leu1-32/leu1-32 ura4-D18/ura4-D18</i> | integrant construction | This work        |

<sup>a</sup>Vanderbilt University School of Medicine, Nashville, TN.

**Table S2: Primers used in this study**

| Analysis | Name                | Purpose                                      | Primer sequence(s) (5'-3')    |
|----------|---------------------|----------------------------------------------|-------------------------------|
| RT-PCR   | tbp1_a F<br>BL365   | amplify first<br><i>tbp1</i> intron          | CGCTTTACCCACCACGGCCTCGCAAG    |
| RT-PCR   | tbp1_a R<br>BL366   | amplify first<br><i>tbp1</i> intron          | TTCTGCATTACGTGCATGTAGCGC      |
| RT-PCR   | mrps16_b F<br>BL541 | amplify<br>second<br><i>mrps16</i><br>intron | AAAGCACCTCAAGCCAAACCTATCGA    |
| RT-PCR   | mrps16_b R<br>BL542 | amplify<br>second<br><i>mrps16</i><br>intron | TCAAGAAACGGGTTTTTTAGGAAGCAACT |
| Northern | BL432               | hybridize U1                                 | ATAACTGAGTCTCCACAATTCTTG TG   |
| Northern | BL429               | hybridize U2                                 | AGAACAGATACTACACTTGATCTAAG    |
| Northern | BL433               | hybridize U4                                 | AAAAGTTCCTCACTGATAAGCGTAAT    |
| Northern | BL434               | hybridize U5                                 | ACAGTCAAATTAGCACACCTTACAAA    |
| Northern | BL435               | hybridize U6                                 | TCTTCTCTGTATCGTTTTCAATTTGAC   |

**Table S3.** Pre-mRNA splicing factors co-purifying with TAP-NTE in a *cwf10-ΔNTE* background at either 150 or 75 mM NaCl detected by 1D liquid chromatography-tandem mass spectrometry (LC-MS/MS).

|                       | <i>S. pombe</i> | ORF number    | TAP-NTE from <i>cwf10-ΔNTE</i> |     |            |      | <i>S. cerevisiae</i> | <i>H. sapiens</i> |
|-----------------------|-----------------|---------------|--------------------------------|-----|------------|------|----------------------|-------------------|
|                       |                 |               | 150 mM NaCl <sup>a</sup>       |     | 75 mM NaCl |      |                      |                   |
|                       |                 |               | I                              | II  | I          | II   |                      |                   |
| <b>Core snRNP</b>     | Smb1            | SPAC26A3.08   | 4 <sup>b</sup>                 | 3   | 4          | 3    | Smb1                 | SMB/B'            |
|                       | Smd1            | SPAC27D7.07c  | 1                              | 3   | 3          | 3    | Smd1                 | SMD1              |
|                       | Smd2            | SPAC2C4.03c   | 6                              | 3   | 5          | 6    | Smd2                 | SMD2              |
|                       | Smd3            | SPBC19C2.14   | 3                              | 1   | 4          | 5    | Smd3                 | SMD3              |
|                       | Sme1            | SPBC11G11.06c | 1                              | 1   | 2          | 3    | Sme1                 | SME1              |
|                       | Smf1            | SPBC3E7.14    | 5                              | 3   | 4          | 3    | Smf1                 | SMF1              |
|                       | Smg1            | SPBC4B4.05    | --- <sup>c</sup>               | 3   | 2          | 3    | Smg2                 | SMG1              |
| <b>U2</b>             | Lea1            | SPBC1861.08c  | 9                              | 3   | 15         | 8    | Lea1                 | U2A'              |
|                       | Msl1            | SPBC8D2.09c   | 1                              | --- | 3          | 1    | Msl1                 | U2B''             |
|                       | Prp10           | SPAC27F1.09c  | ---                            | --- | 1          | ---  | Hsh155               | SF3B160           |
| <b>U5</b>             | Cwf10-ΔNTE      | SPBC215.12    | 60                             | 42  | 71         | 65   | Snu114               | U5-116            |
|                       | Brr2            | SPAC9.03c     | ---                            | --- | ---        | ---- | Brr2                 | U5-200            |
|                       | Spp42           | SPAC4F8.12c   | 57                             | 33  | 77         | 75   | Prp8                 | U5-220            |
|                       | Cwf17/Spf38     | SPBC1289.11   | 9                              | 4   | 16         | 12   | UNK <sup>d</sup>     | U5-40             |
| <b>NTC core</b>       | Cdc5            | SPAC644.12    | 34                             | 13  | 39         | 42   | Cef1                 | CDC5              |
|                       | Cwf2            | SPAC3A12.11c  | 13                             | 5   | 14         | 15   | Cwc2                 | RBM22             |
|                       | Cwf7            | SPBC28F2.04c  | 10                             | 6   | 14         | 8    | Snt309               | SPF27             |
|                       | Cwf15           | SPBC337.06c   | 6                              | 1   | 9          | 7    | Cwc15                | AD002             |
|                       | Prp5            | SPBP22H7.07   | 14                             | 8   | 22         | 22   | Prp46                | PRL1              |
|                       | Prp19           | SPAC29A4.08c  | 18                             | 17  | 16         | 25   | Prp19                | PRP19             |
| <b>NTC-associated</b> | Cwf3            | SPBC211.02c   | 26                             | 9   | 32         | 36   | Syf1                 | SYF1              |
|                       | Cwf4            | SPBC31F10.11c | 21                             | 11  | 28         | 25   | Cif1                 | CRN1              |
|                       | Cwf5/Ecm2       | SPCC550.02c   | 12                             | 10  | 21         | 22   | Ecm2/Slt11           | RBM22             |
|                       | Cwf12           | SPBC32F12.05c | 6                              | 6   | 8          | 7    | Isy1                 | ISY1              |
|                       | Prp45           | SPCC188.11    | 3                              | 3   | 10         | 11   | Prp45                | SKIP              |
|                       | Prp17           | SPBC6B1.10    | 17                             | 15  | 25         | 31   | Prp17                | hPRP17            |
|                       | Syf2            | SPBC3E7.13c   | 10                             | 5   | 10         | 9    | Syf2                 | SYF2              |
| <b>Other</b>          | Cwf11           | SPBC646.02    | 36                             | 17  | 52         | 50   | UNK                  | hCWF11            |
|                       | Cwf14           | SPBC24C6.11   | 8                              | 4   | 10         | 11   | Cwc14                | G10               |
|                       | Cwf18           | SPCP1E11.07c  | 6                              | 5   | 8          | 5    | UNK                  | MGC23918          |
|                       | Cwf19           | SPAC30D11.09  | 11                             | 3   | 15         | 19   | UNK                  | hCWF19L2          |
|                       | Cwf21           | SPAC4A8.09c   | 1                              | --- | 5          | 2    | Cwc21                | SRm300            |
|                       | Cwf22           | SPBC13E7.01   | 2                              | 1   | 4          | 6    | Cwc22                | hCWC22            |
|                       | Cyp1            | SPAC57A10.03  | 5                              | 1   | 5          | 5    | UNK                  | PPIL1             |
|                       | Mug161          | SPAC1F3.09    | ---                            | --- | ---        | ---  | YGR093W              | CWF19L1           |
|                       | Prp16           | SPBC1711.17   | ---                            | --- | ---        | ---  | Prp16                | PRP16             |
|                       | Prp43           | SPBC16H5.10c  | ---                            | --- | ---        | ---  | Prp43                | hPRP43            |
|                       | Prp22           | SPAC10F6.02c  | ---                            | --- | 1          | ---  | Prp22                | hPRP22            |
|                       | Saf4            | SPBC18H10.10c | 3                              | 3   | 7          | 4    | UNK                  | CCDC130           |

|  |         |              |     |     |     |     |      |       |
|--|---------|--------------|-----|-----|-----|-----|------|-------|
|  | Slu7    | SPBC365.05c  | --- | --- | --- | --- | Slu7 | SLU7  |
|  | Sum3    | SPCC1795.11  | 7   | 1   | 2   | 1   | Ded1 | DDX3  |
|  | unnamed | SPAC20H4.09  | --- | --- | --- | --- | UNK  | DHX35 |
|  | Pab1    | SPAC57A7.04c | --- | --- | 6   | 6   | Pab1 | PABC1 |
|  | Ubp10   | SPBC577.07   | --- | --- | 1   | 4   | Sad1 | USP39 |

<sup>a</sup>Results for purifications done at 150 mM NaCl are the same as shown in Table 2 and are included again in this table to make comparison easier. <sup>b</sup>Peptide counts of identified proteins in each biological replicate (I and II), <sup>c</sup> --- indicates no peptides identified, <sup>d</sup>UNK indicates that an ortholog is unknown or not present.

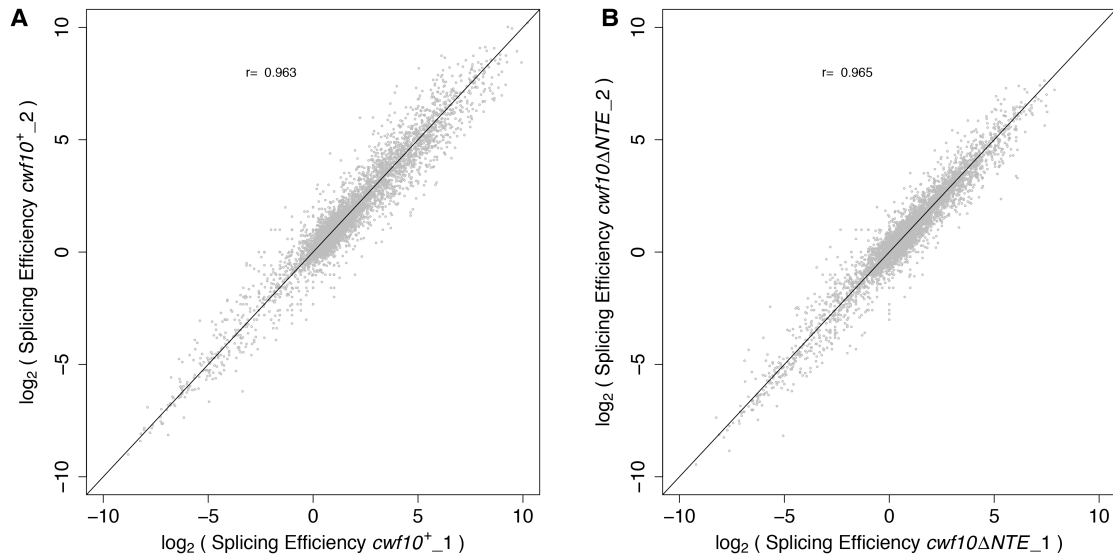

**Figure S1. Reproducibility of splicing efficiency in replicates.** Each point represents an intron (5,361 in total; 'r' Pearson's correlation coefficient;  $\log_2$  scale). (A) Two wild-type replicates. (B) Two *cwf10*- $\Delta$ NTE replicates.

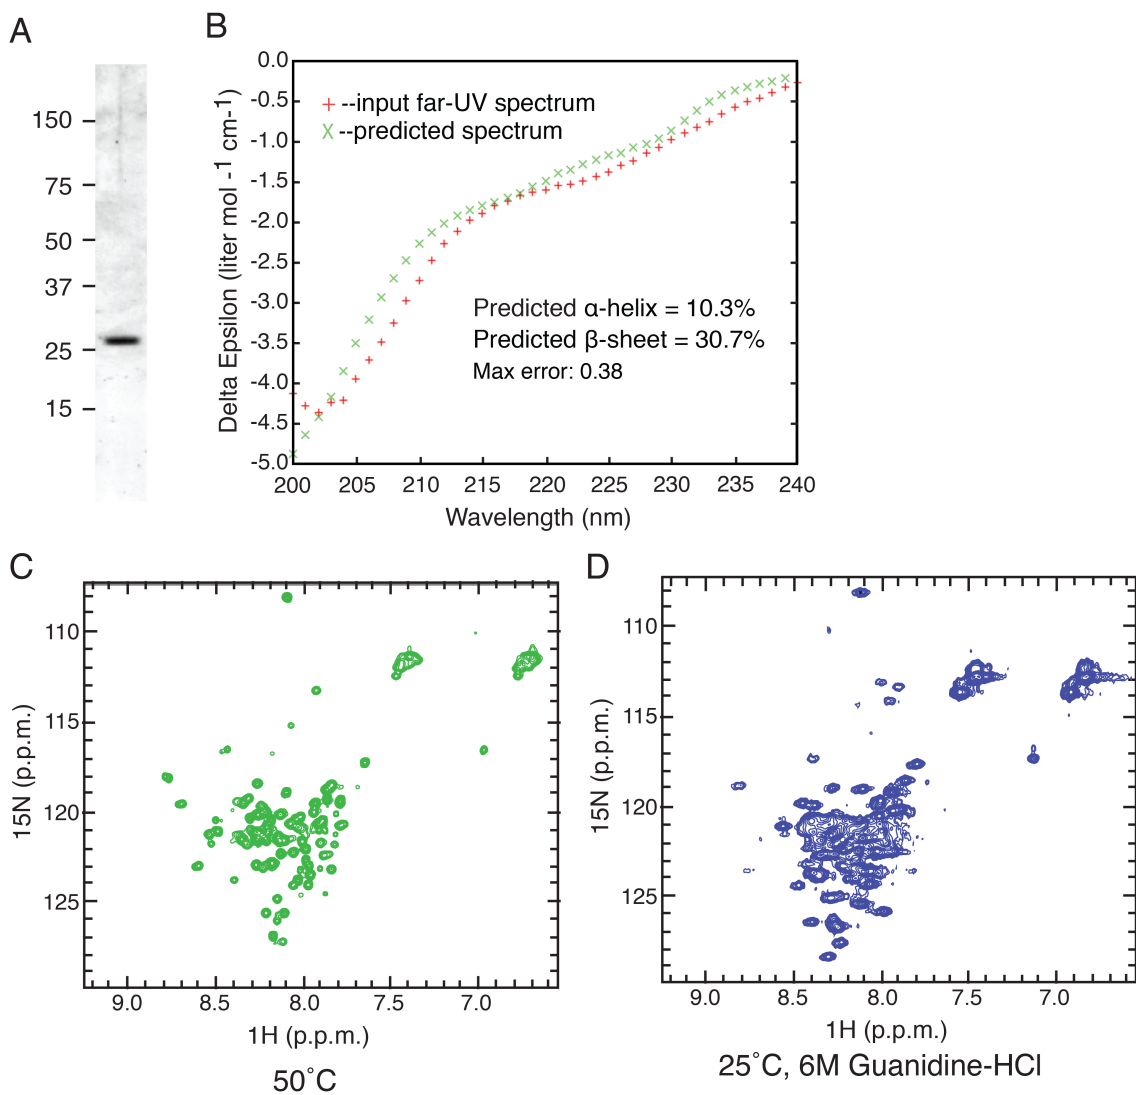

**Figure S2. Analysis of recombinant Cwf10(1-135)His<sub>6</sub>.** (A) Coomassie stained SDS-PAGE gel of recombinant Cwf10(1-135)His<sub>6</sub>. Molecular weight markers in kilodaltons are shown on left. (B) Predicted secondary structure calculated from the Far-UV spectrum seen in Fig. 6E using the program K2D2 (1). (C) <sup>15</sup>N-<sup>1</sup>H HSQC spectrum of Cwf10(1-135)His<sub>6</sub> at 50°C. (D) <sup>15</sup>N-<sup>1</sup>H HSQC spectrum of Cwf10(1-135)His<sub>6</sub> in 6 M Guanidine-HCl.

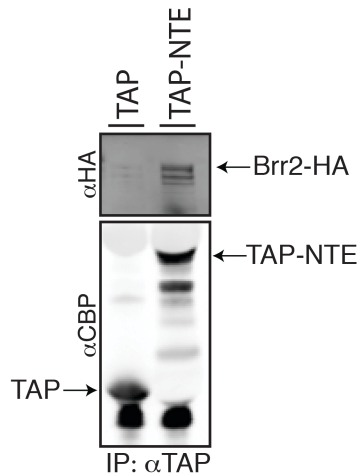

**Figure S3. TAP-NTE co-immunoprecipitates Brr2-HA.** *pREP41 NTAP* or *pREP41 NTAP-NTE* were expressed in *cwf10-ΔNTE brr2-HA* cells. TAP and TAP-NTE were immunoprecipitated with IgG-Sepharose beads and then immunoblotted with anti-HA antibodies. Positions of proteins on the immunoblot are labeled.

#### SUPPLEMENTAL REFERENCES

1. **Carnahan, R. H., A. Feoktistova, L. Ren, S. Niessen, J. R. Yates, 3rd, and K. L. Gould.** 2005. Dim1p is required for efficient splicing and export of mRNA encoding lid1p, a component of the fission yeast anaphase-promoting complex. *Eukaryot. Cell* **4**:577-587.
2. **Nasmyth, K., and P. Nurse.** 1981. Cell division cycle mutants altered in DNA replication and mitosis in the fission yeast *Schizosaccharomyces pombe*. *Mol. Gen. Genet.* **182**:119-124.
3. **Urushiyama, S., T. Tani, and Y. Ohshima.** 1996. Isolation of novel pre-mRNA splicing mutants of *Schizosaccharomyces pombe*. *Mol. Gen. Genet.* **253**:118-127.



4. **Schmidt, H., K. Richert, R. A. Drakas, and N. F. Käufer.** 1999. *spp42*, identified as a classical suppressor of *prp4-73*, which encodes a kinase involved in pre-mRNA splicing in fission yeast, is a homologue of the splicing factor Prp8p. *Genetics* **153**:1183-1191.
5. **Rosenberg, G. H., S. K. Alahari, and N. F. Käufer.** 1991. *prp4* from *Schizosaccharomyces pombe*, a mutant deficient in pre-mRNA splicing isolated using genes containing artificial introns. *Mol. Gen. Genet.* **226**:305-309.
6. **Kim, D. U., J. Hayles, D. Kim, V. Wood, H. O. Park, M. Won, H. S. Yoo, T. Duhig, M. Nam, G. Palmer, S. Han, L. Jeffery, S. T. Baek, H. Lee, Y. S. Shim, M. Lee, L. Kim, K. S. Heo, E. J. Noh, A. R. Lee, Y. J. Jang, K. S. Chung, S. J. Choi, J. Y. Park, Y. Park, H. M. Kim, S. K. Park, H. J. Park, E. J. Kang, H. B. Kim, H. S. Kang, H. M. Park, K. Kim, K. Song, K. B. Song, P. Nurse, and K. L. Hoe.** 2010. Analysis of a genome-wide set of gene deletions in the fission yeast *Schizosaccharomyces pombe*. *Nat. Biotechnol.* **28**:617-623.
7. **Ohi, M. D., A. J. Link, L. Ren, J. L. Jennings, W. H. McDonald, and K. L. Gould.** 2002. Proteomics analysis reveals stable multiprotein complexes in both fission and budding yeasts containing Myb-related Cdc5p/Cef1p, novel pre-mRNA splicing factors, and snRNAs. *Mol. Cell. Biol.* **22**:2011-2024.
8. **Perez-Iratxeta, C., and M. A. Andrade-Navarro.** 2008. K2D2: estimation of protein secondary structure from circular dichroism spectra. *BMC Struct. Biol.* **8**:25.
